# Supplementary material for: Sacrificial agent-free photocatalytic CO2 reduction using a 2D cobalt porphyrin-based MOF/graphene heterojunction
Source: Royal Society of Chemistry journal article supplement (doi:10.1039/d2cy00886f), 2022-01-01
Supplement: d2cy00886f1.pdf [file d2cy00886f1.pdf]

## Supplementary Information

### **Sacrificial agent-free photocatalytic CO<sub>2</sub> reduction by a 2D cobalt porphyrin-based MOF/graphene heterojunction**

Lin Cheng, Changchang Wu, Huifang Feng, Hong Liu\*

Department of Chemical Engineering, School of Environmental and Chemical Engineering, Shanghai University, 99 Shangda Road, Shanghai 200444, P. R. China

\*Corresponding author.

Tel.: +86 21 66137487; Email: liuhong@shu.edu.cn

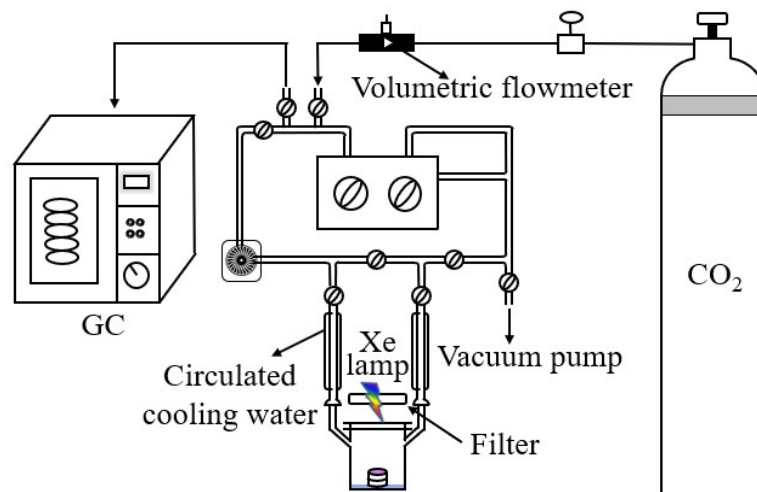

**Fig. S1.** Diagram of photocatalytic CO<sub>2</sub> reduction device.

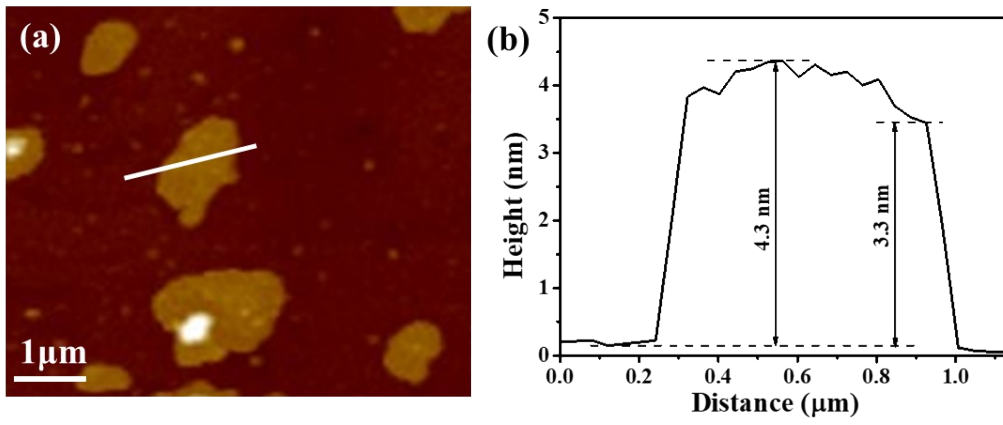

**Fig. S2.** (a) AFM image and (b) the corresponding height profile of Co-PMOF.

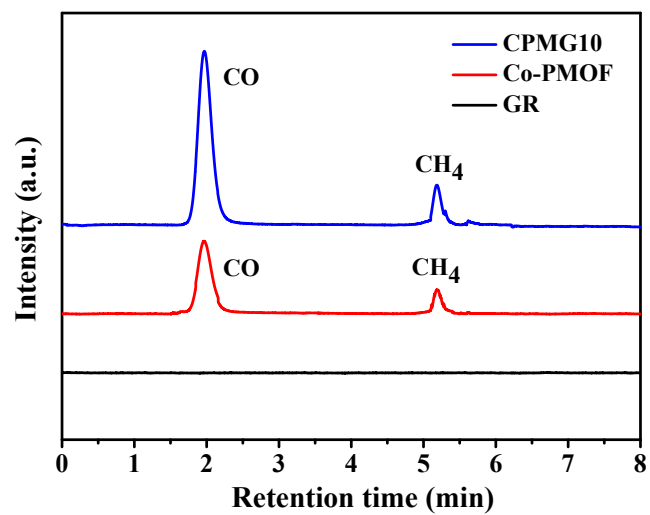

**Fig. S3.** Original chromatograms for the as-synthesized samples after 8 h of irradiation.

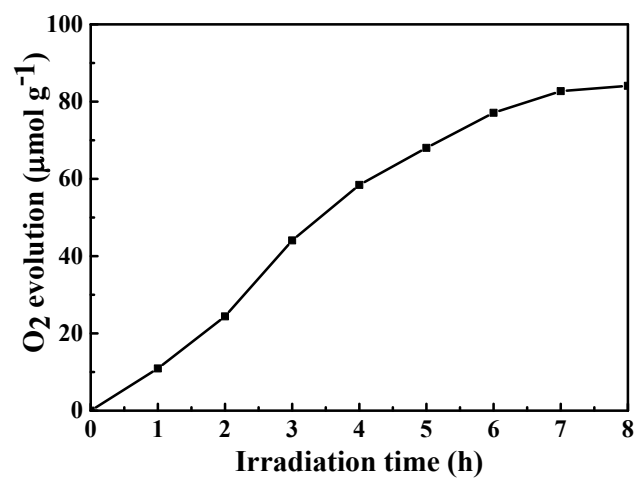

**Fig. S4.** Photocatalytic O<sub>2</sub> evolution over CPMG10.

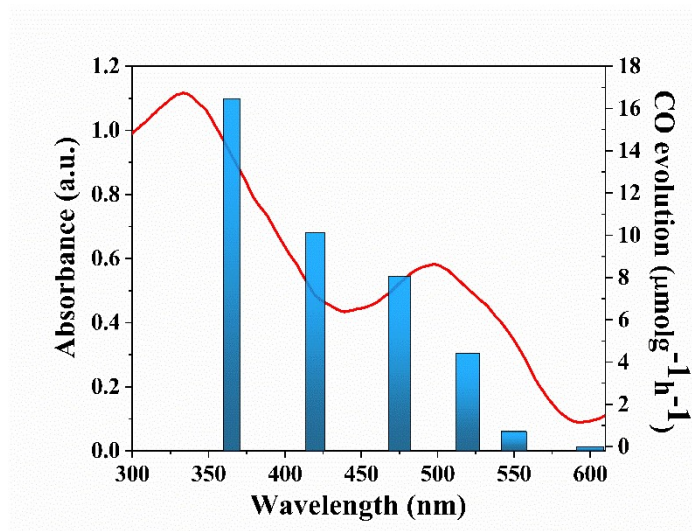

**Fig. S5.** Wavelength-dependence of the CO evolution rate over CPMG10.

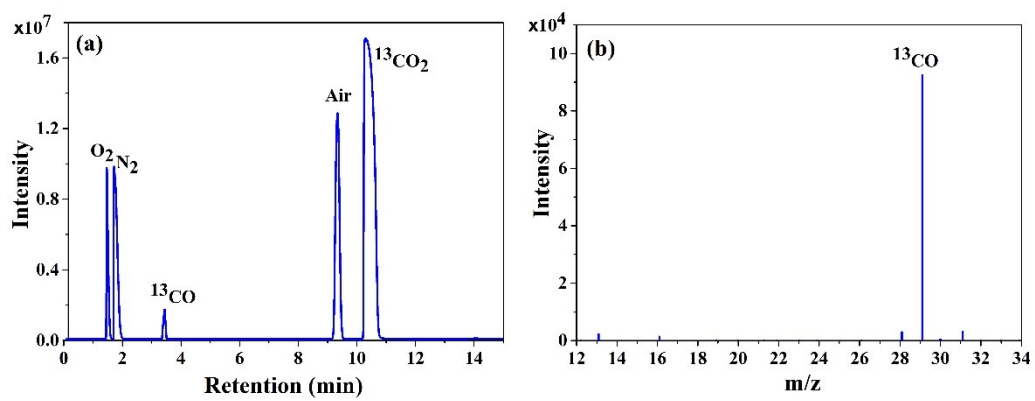

**Fig. S6.** GC-MS data of CO produced during photocatalytic  $^{13}CO_2$  reduction over CPMG10.

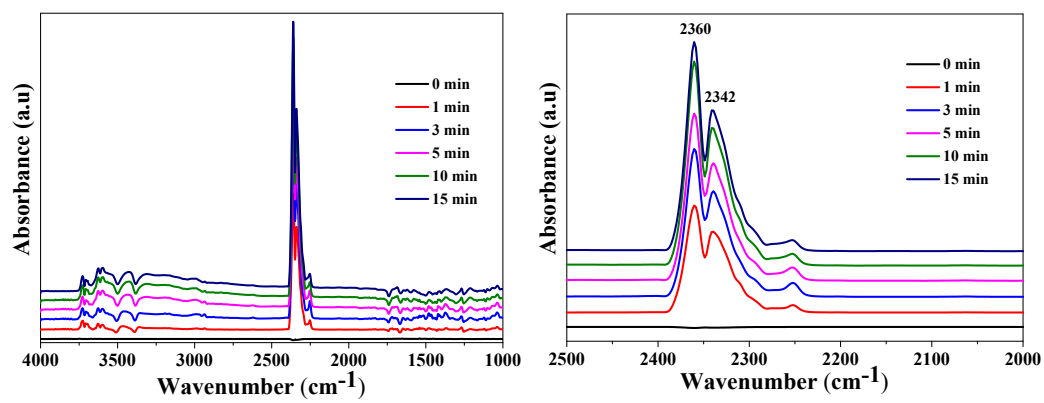

**Fig. S7.** In situ DRIFT spectra of CO<sub>2</sub> and H<sub>2</sub>O absorption on CPMG10 in dark.



**Table S1.** Comparison of the photocatalytic performance in this work with the previous reported photocatalysts for CO<sub>2</sub> reduction.

| Sample                                         | Reaction condition                      | Light source                                    | Yield rate ( $\mu\text{mol}\cdot\text{g}^{-1}\cdot\text{h}^{-1}$ ) | Ref.      |
|------------------------------------------------|-----------------------------------------|-------------------------------------------------|--------------------------------------------------------------------|-----------|
| Co-PMOF/GR                                     | CO <sub>2</sub> /H <sub>2</sub> O vapor | 300 W Xe lamp ( $\lambda > 420$ nm)             | 20.25/1.61 (CO/CH <sub>4</sub> )                                   | This work |
| Co-MOF/Cu <sub>2</sub> O                       | CO <sub>2</sub> /H <sub>2</sub> O vapor | 300 W Xe lamp ( $\lambda > 420$ nm)             | 3.83 (CO)                                                          | 1         |
| CdS-P25/ZIF-67                                 | CO <sub>2</sub> /H <sub>2</sub> O vapor | 300 W Xe lamp ( $320 \leq \lambda \leq 780$ nm) | 14.9/15.8 (CO/CH <sub>4</sub> )                                    | 2         |
| Co <sub>0.1</sub> Ni <sub>0.9</sub> -MOF       | CO <sub>2</sub> /H <sub>2</sub> O vapor | 300 W Xe lamp                                   | 38.74 (CO)                                                         | 3         |
| CdS/Ni-MOF                                     | CO <sub>2</sub> /H <sub>2</sub> O vapor | 300 W Xe lamp                                   | 1.87/0.11 (CO/CH <sub>4</sub> )                                    | 4         |
| Zn-MOF/BiVO <sub>4</sub>                       | CO <sub>2</sub> /H <sub>2</sub> O vapor | 300 W Xe lamp ( $\lambda > 420$ nm)             | 4.31/0.62 (CO/CH <sub>4</sub> )                                    | 5         |
| PCN-222(Cu)/TiO <sub>2</sub>                   | CO <sub>2</sub> /H <sub>2</sub> O vapor | 300 W Xe lamp                                   | 13.24/1.73 (CO/CH <sub>4</sub> )                                   | 6         |
| CsPbBr <sub>3</sub> @ZIF-8                     | CO <sub>2</sub> /H <sub>2</sub> O vapor | 100 W Xe lamp equipped with AM 1.5G filter      | 15.49 (CO)                                                         | 7         |
| TiO <sub>2</sub> /UiO-66                       | CO <sub>2</sub> /H <sub>2</sub> O vapor | 300 W Xe lamp                                   | 17.9/1.9 (CH <sub>4</sub> /CO)                                     | 8         |
| TiO <sub>2</sub> /NH <sub>2</sub> -MIL-125(Ti) | CO <sub>2</sub> /H <sub>2</sub> O vapor | 300 W Xe lamp ( $\lambda > 420$ nm)             | 1.18 (CH <sub>4</sub> )                                            | 9         |

## References

1. W. W. Dong, J. Jia, Y. Wang, J. R. An, O. Y. Yang, X. J. Gao, Y. L. Liu, J. Zhao and D. S. Li, *Chem. Eng. J.*, 2022, **438**, 135622.
2. L. Wang, Z. Zhang, Q. Han, Y. Liu, J. Zhong, J. Chen, J. Huang, H. She and Q. Wang, *Appl. Surf. Sci.*, 2022, **584**, 152645.
3. T. Wei, L. Wang, K. Mao, J. Chen, J. Dai, Z. Zhang, L. Liu and X. Wu, *J. Colloid Interface Sci.*, 2022, **622**, 402.
4. M. Xu, C. Sun, X. Zhao, H. Jiang, H. Wang and P. Huo, *Appl. Surf. Sci.*, 2022, **576**, 151792.
5. Z. Zhao, J. Bian, L. Zhao, H. Wu, S. Xu, L. Sun, Z. Li, Z. Zhang and L. Jing, *Chin. J. Catal.*, 2022, **43**, 1331.
6. S. Duan, S. Wu, L. Wang, H. She, J. Huang and Q. Wang, *Acta Phys.-Chim. Sin.*, 2020, **36**,

1905086.

7. Z. C. Kong, J. F. Liao, Y. J. Dong, Y. F. Xu, H. Y. Chen, D. B. Kuang and C. Y. Su, *ACS Energy Lett.*, 2018, **3**, 2656.

8. Y. Ma, Q. Tang, W. Y. Sun, Z. Y. Yao, W. Zhu, T. Li and J. Wang, *Appl. Catal. B: Environ.*, 2020, **270**, 118856.

9. J. Hu, J. Ding and Q. Zhong, *J. Colloid Interface Sci.*, 2020, **560**, 857.
